# Supplementary material for: Intramolecular π-conjugated channel expansion achieved by doping cross-linked dopants into carbon nitride frameworks for propelling photocatalytic hydrogen evolution and mechanism insight
Source: Royal Society of Chemistry journal article supplement (doi:10.1039/d1qi01122g), 2021-10-22
Supplement: d1qi01122g1.pdf [file d1qi01122g1.pdf]

## Electronic Supplementary Information

### Intramolecular $\pi$ -conjugated channel expansion achieved by doping cross-linked dopants into carbon nitride framework towards propelling photocatalytic hydrogen evolution and mechanism insight

Chunmei Li<sup>a</sup>, Tingxu Zhou<sup>a</sup>, Ming Yan<sup>a</sup>, Shasha Cheng<sup>a</sup>, Yun Wang<sup>a</sup>, Jingxue Sun<sup>b</sup>, Gang Chen<sup>b</sup>, Hongjun Dong<sup>a\*</sup>

<sup>a</sup>Institute of Green Chemistry and Chemical Technology, School of Chemistry and Chemical Engineering, Jiangsu University, Zhenjiang 212013, PR China.

<sup>b</sup>MIIT Key Laboratory of Critical Materials Technology for New Energy Conversion and Storage, School of Chemistry and Chemical Engineering, Harbin Institute of Technology, 150001, PR China.

\*Corresponding author: E-mail: donghongjun6698@aliyun.com

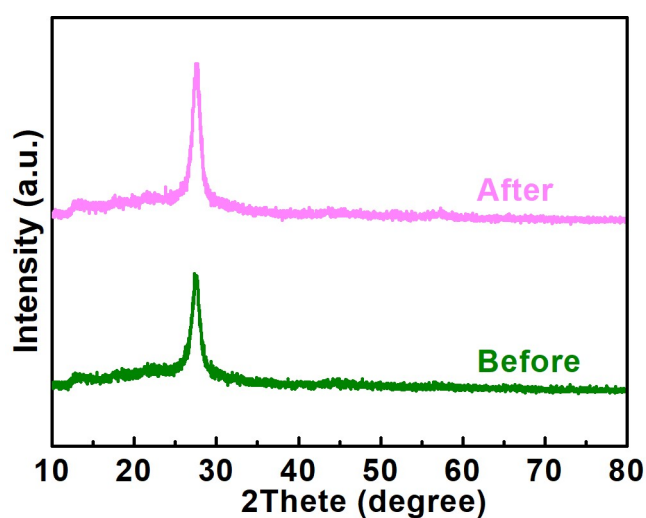

Figure S1. XRD patterns of PYM<sub>100</sub>-CN before and after cycle reactions

**Table S1.** Atomic ratios and band gap values of CN and PYM-CN samples

| Sample                 | C/N   | E <sub>g</sub> |
|------------------------|-------|----------------|
| CN                     | 0.588 | 2.92           |
| PYM <sub>25</sub> -CN  | 0.589 | 2.84           |
| PYM <sub>50</sub> -CN  | 0.592 | 2.80           |
| PYM <sub>100</sub> -CN | 0.593 | 2.72           |
| PYM <sub>150</sub> -CN | 0.594 | 2.69           |
| PYM <sub>250</sub> -CN | 0.598 | 2.66           |

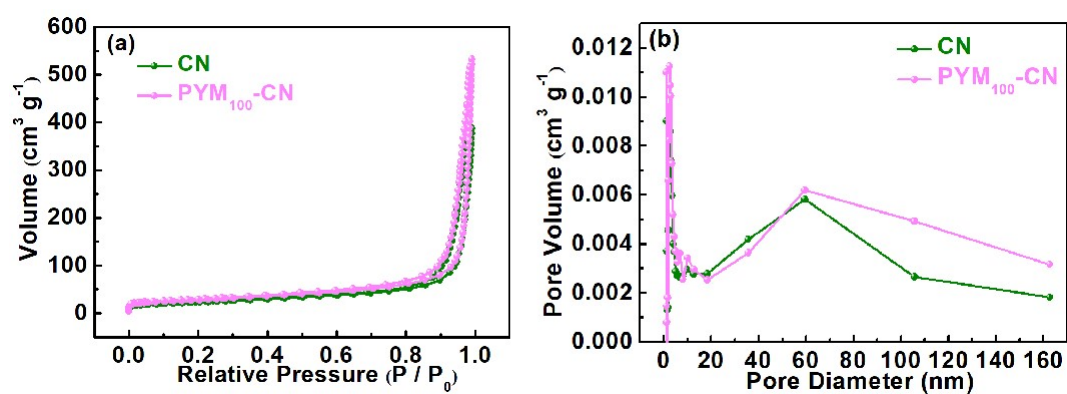

**Figure S2.** N<sub>2</sub> adsorption-desorption isotherms (a) and pore size distribution (b) of CN and PYM<sub>100</sub>-CN samples

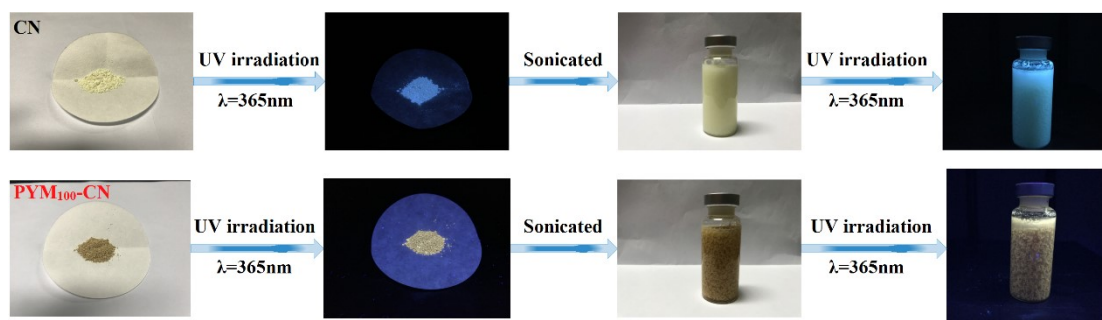

**Figure S3.** Photographs of CN and PYM<sub>100</sub>-CN samples in powders and their suspended under the ultraviolet light irradiation

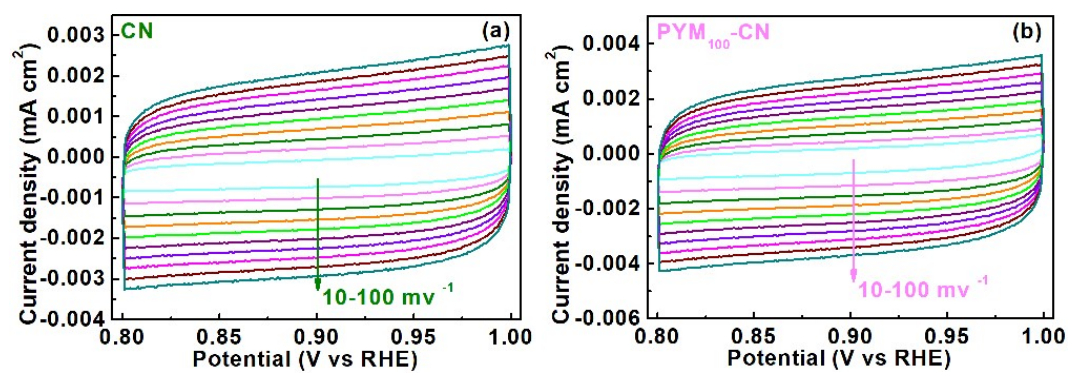

**Figure S4.** Cyclic voltammetry curves of CN (a) and PYM<sub>100</sub>-CN (b) at different scanning rates
